# Supplementary material for: Fumarate hydratase-deficient renal cell carcinoma cells respond to asparagine by activation of the unfolded protein response and stimulation of the hexosamine biosynthetic pathway
Source: PubMed Central journal article supplement (PMC7397616; doi:10.1186/s40170-020-00214-9), 2020-08-03
Supplement: 40170_2020_214_MOESM1_ESM.pdf [file 40170_2020_214_MOESM1_ESM.pdf]

Figure S1

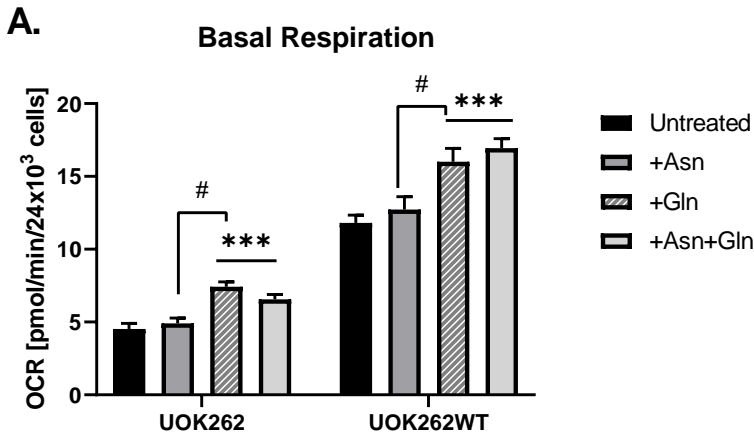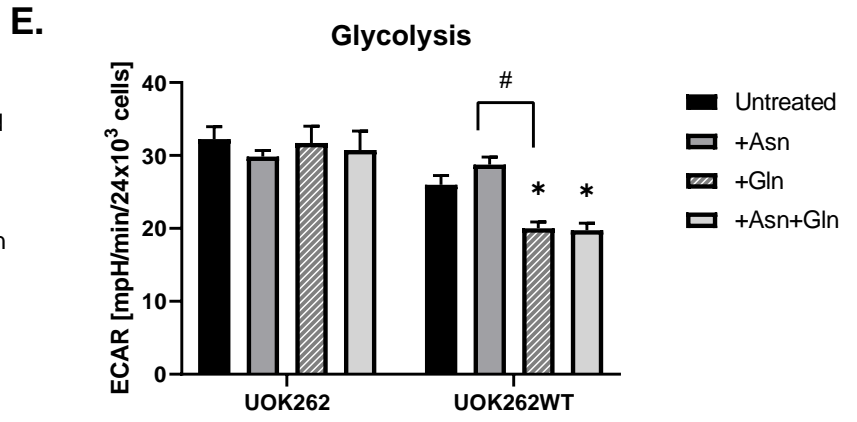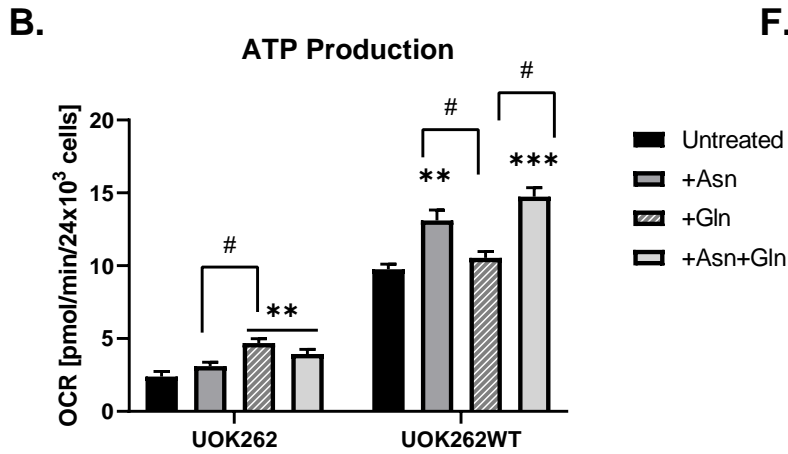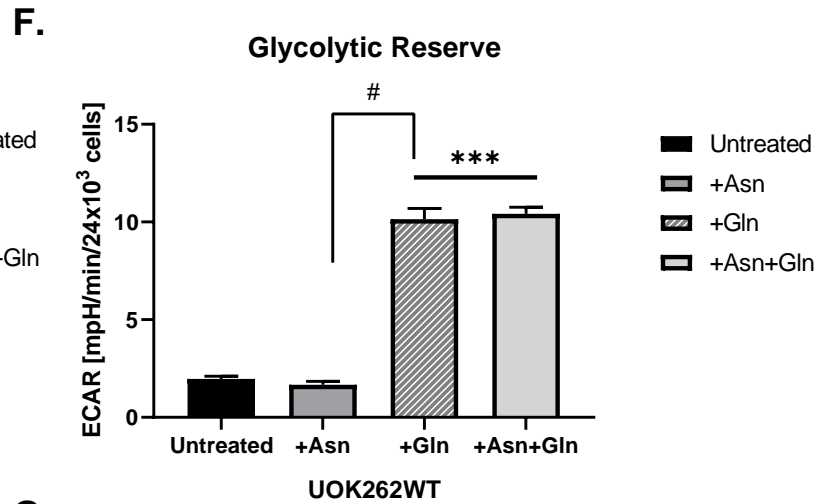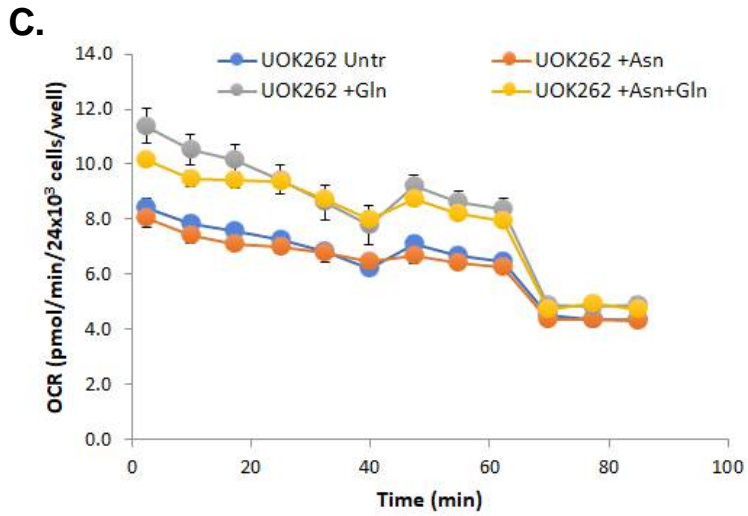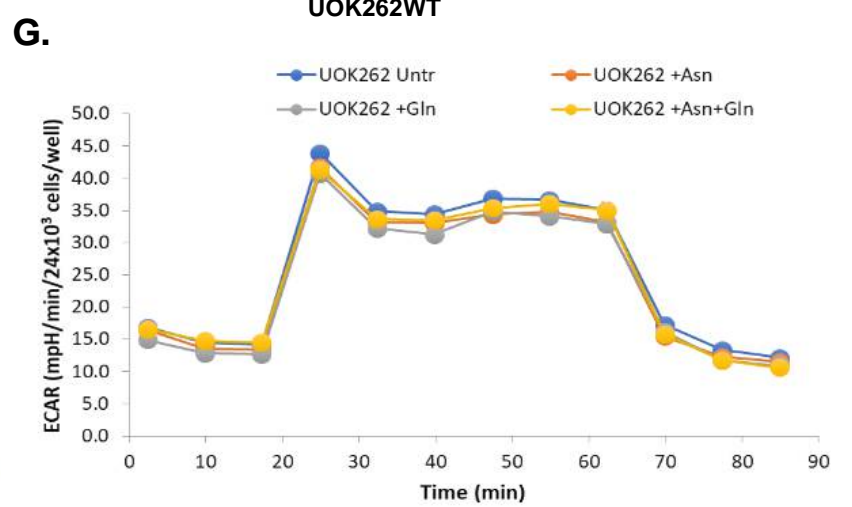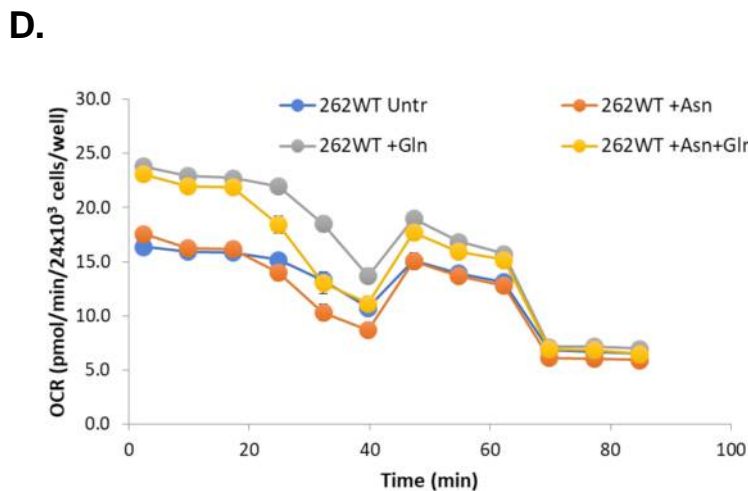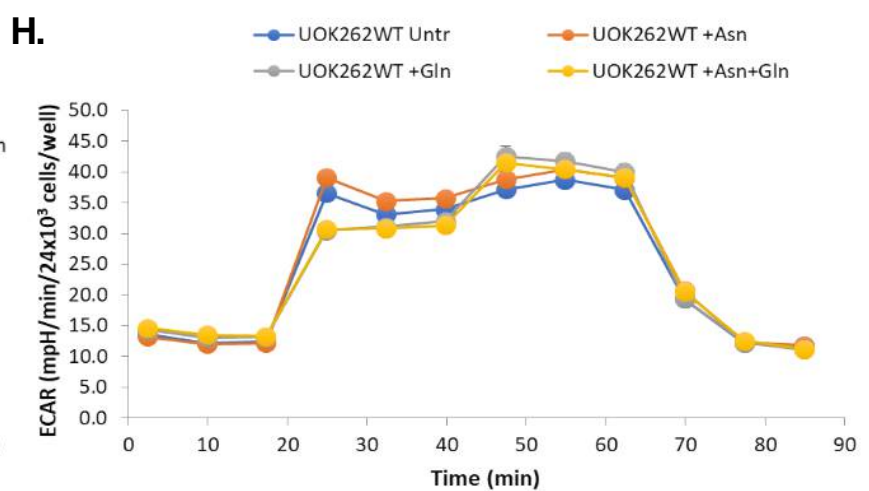

Figure S2

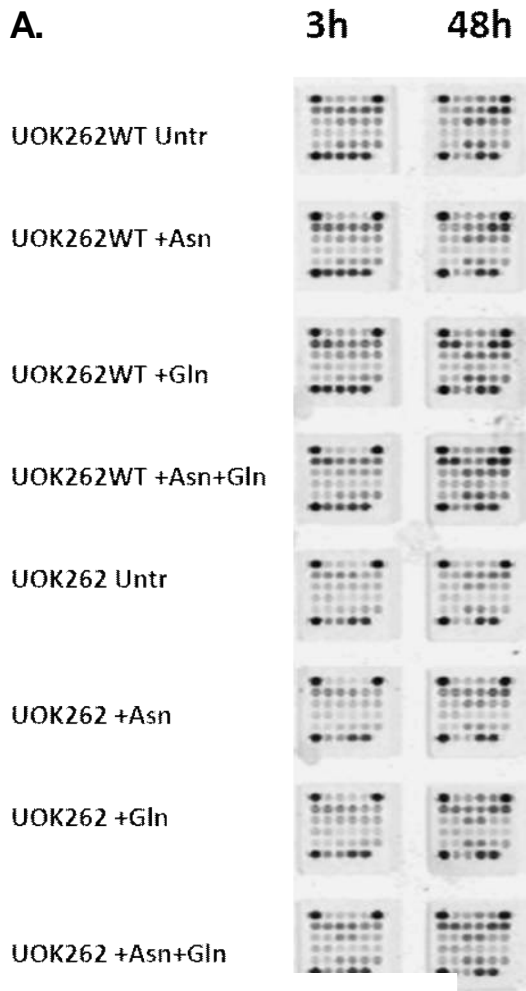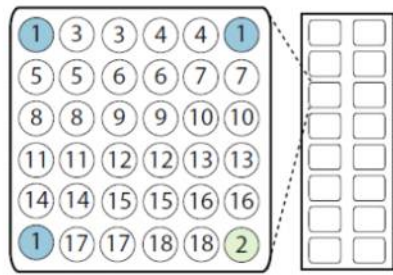

**Akt Signaling**

| Target                 | Phosphorylation Site |
|------------------------|----------------------|
| 1 Positive Control     | N/A                  |
| 2 Negative Control     | N/A                  |
| 3 Akt                  | Thr308               |
| 4 Akt                  | Ser473               |
| 5 S6 Ribosomal Protein | Ser235/236           |
| 6 AMPK $\alpha$        | Thr172               |
| 7 PRAS40               | Thr246               |
| 8 mTOR                 | Ser2481              |
| 9 GSK-3 $\alpha$       | Ser21                |
| 10 GSK-3 $\beta$       | Ser9                 |
| 11 p70 S6 Kinase       | Thr389               |
| 12 p70 S6 Kinase       | Thr421/Ser424        |
| 13 Bad                 | Ser112               |
| 14 RSK1                | Ser380               |
| 15 PTEN                | Ser380               |
| 16 PDK1                | Ser241               |
| 17 Erk1/2              | Thr202/Tyr204        |
| 18 4E-BP1              | Thr37/46             |

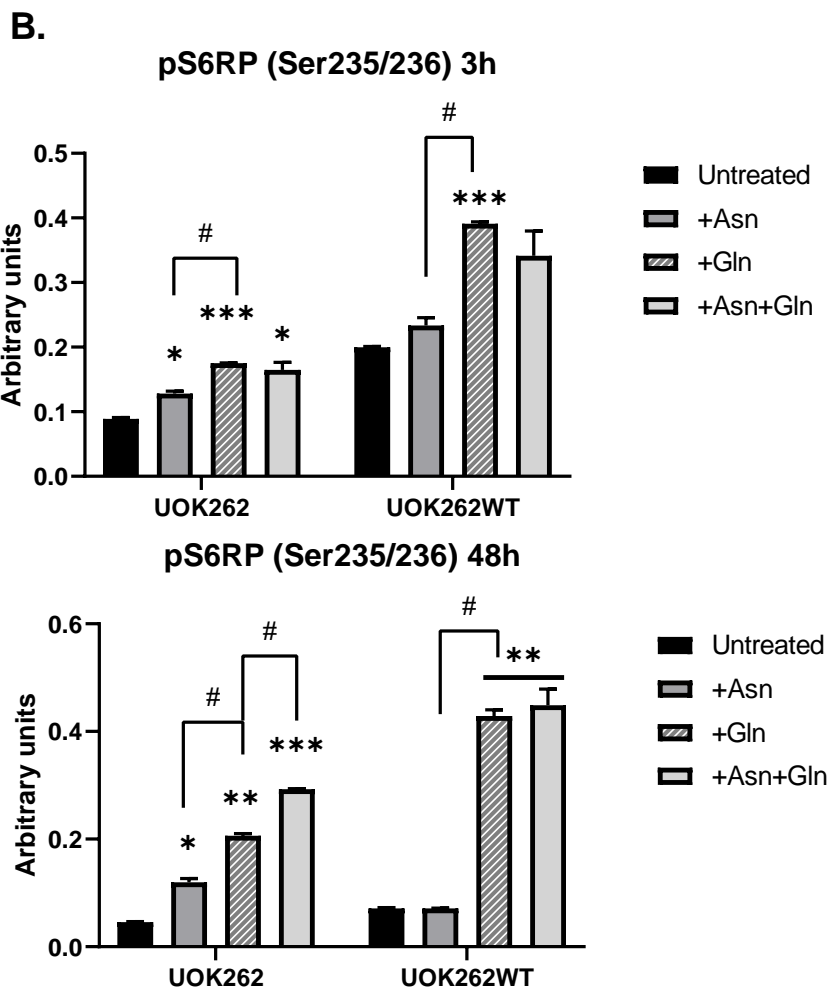

**C.**

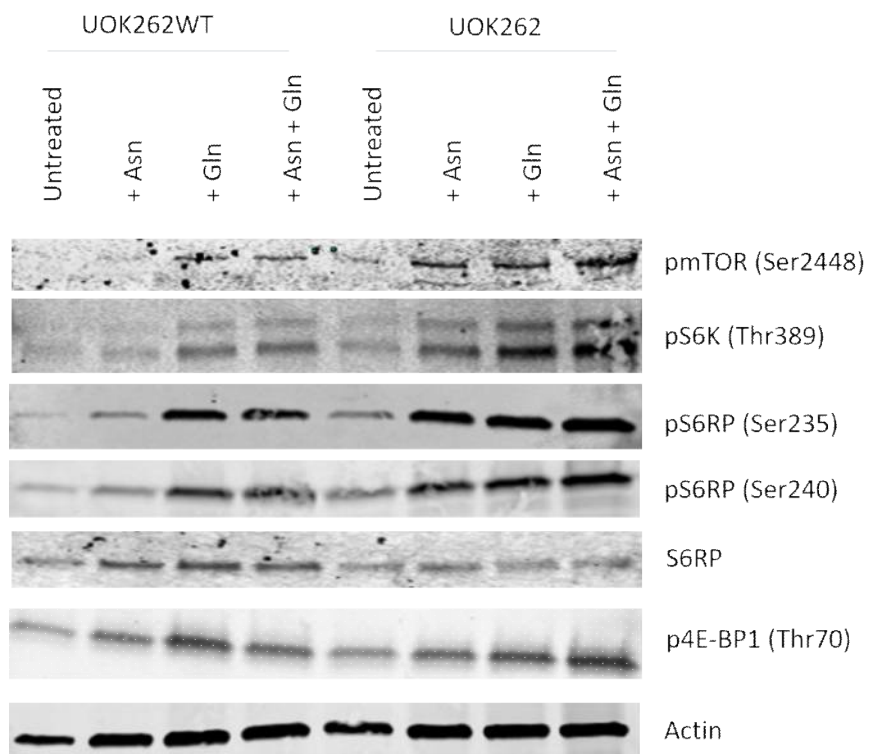

Figure S3

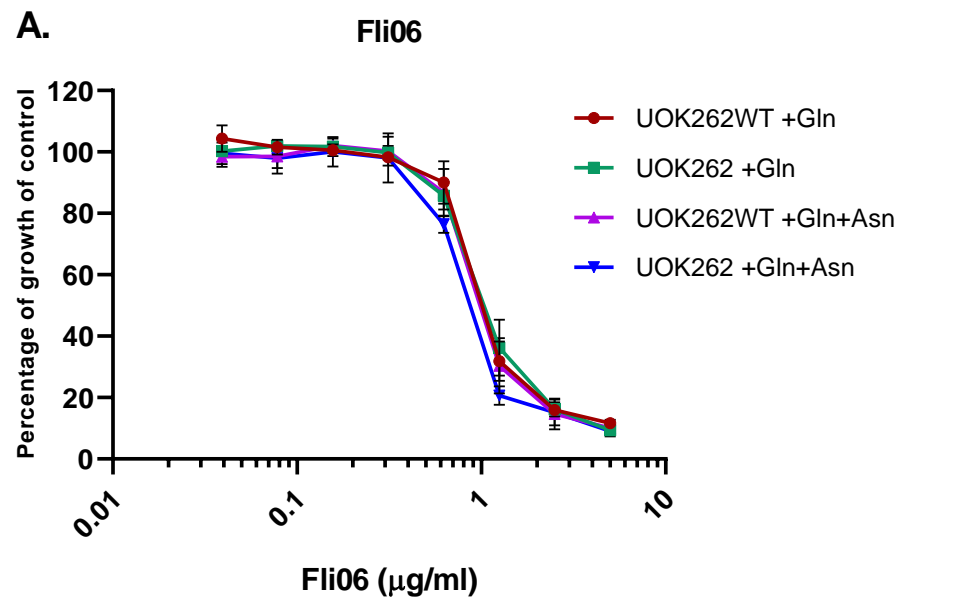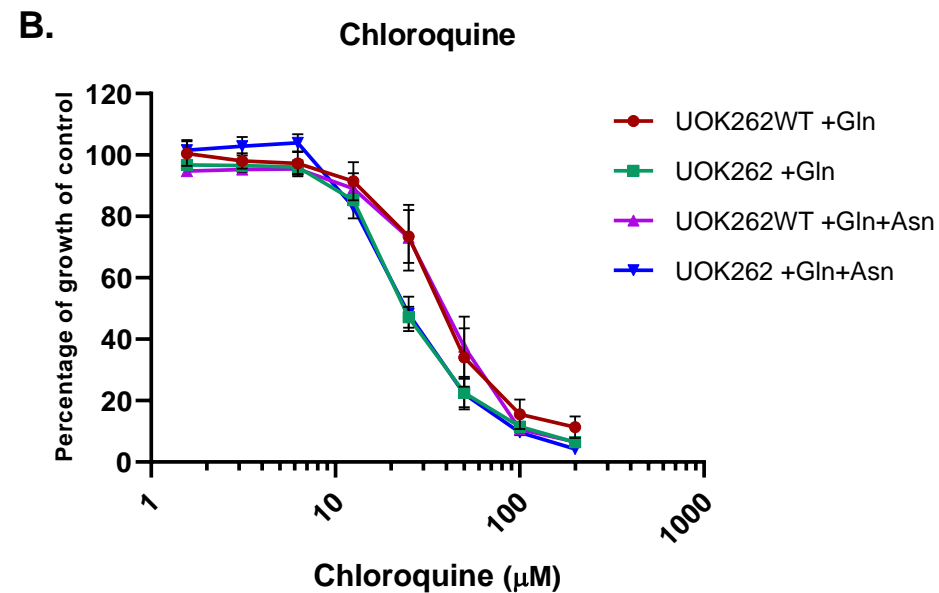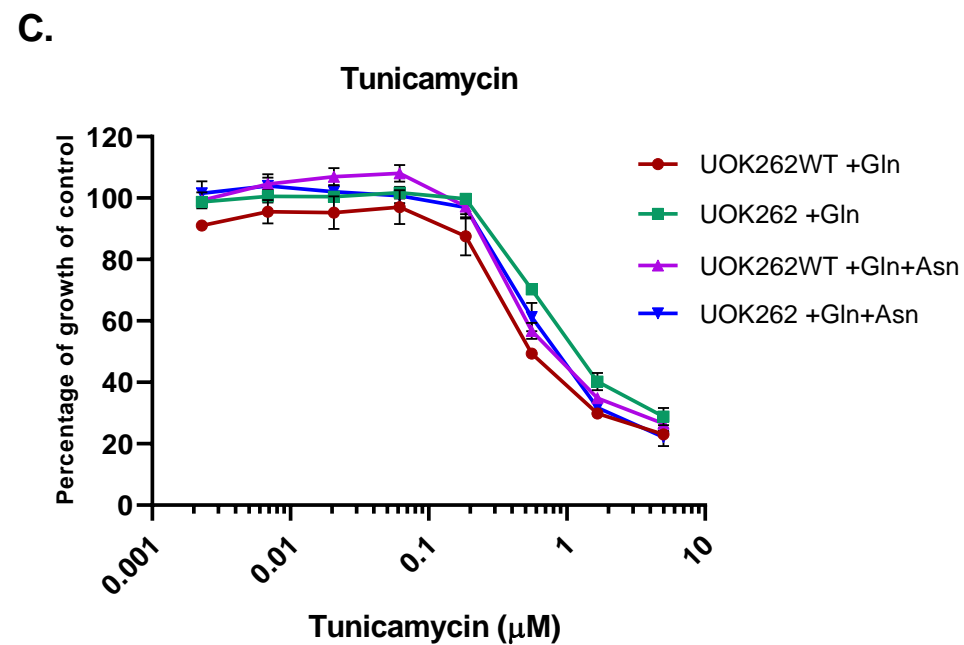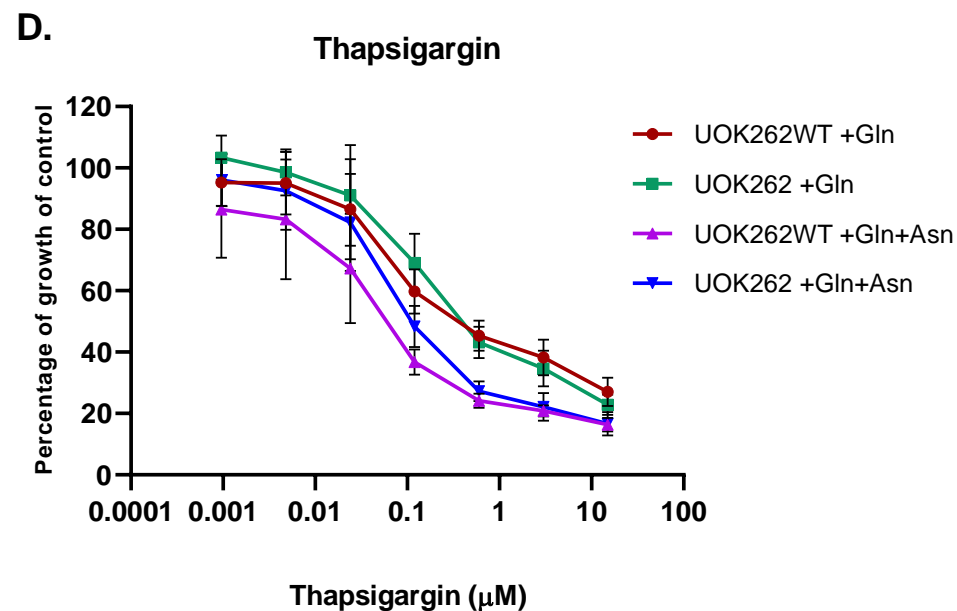

Figure S4

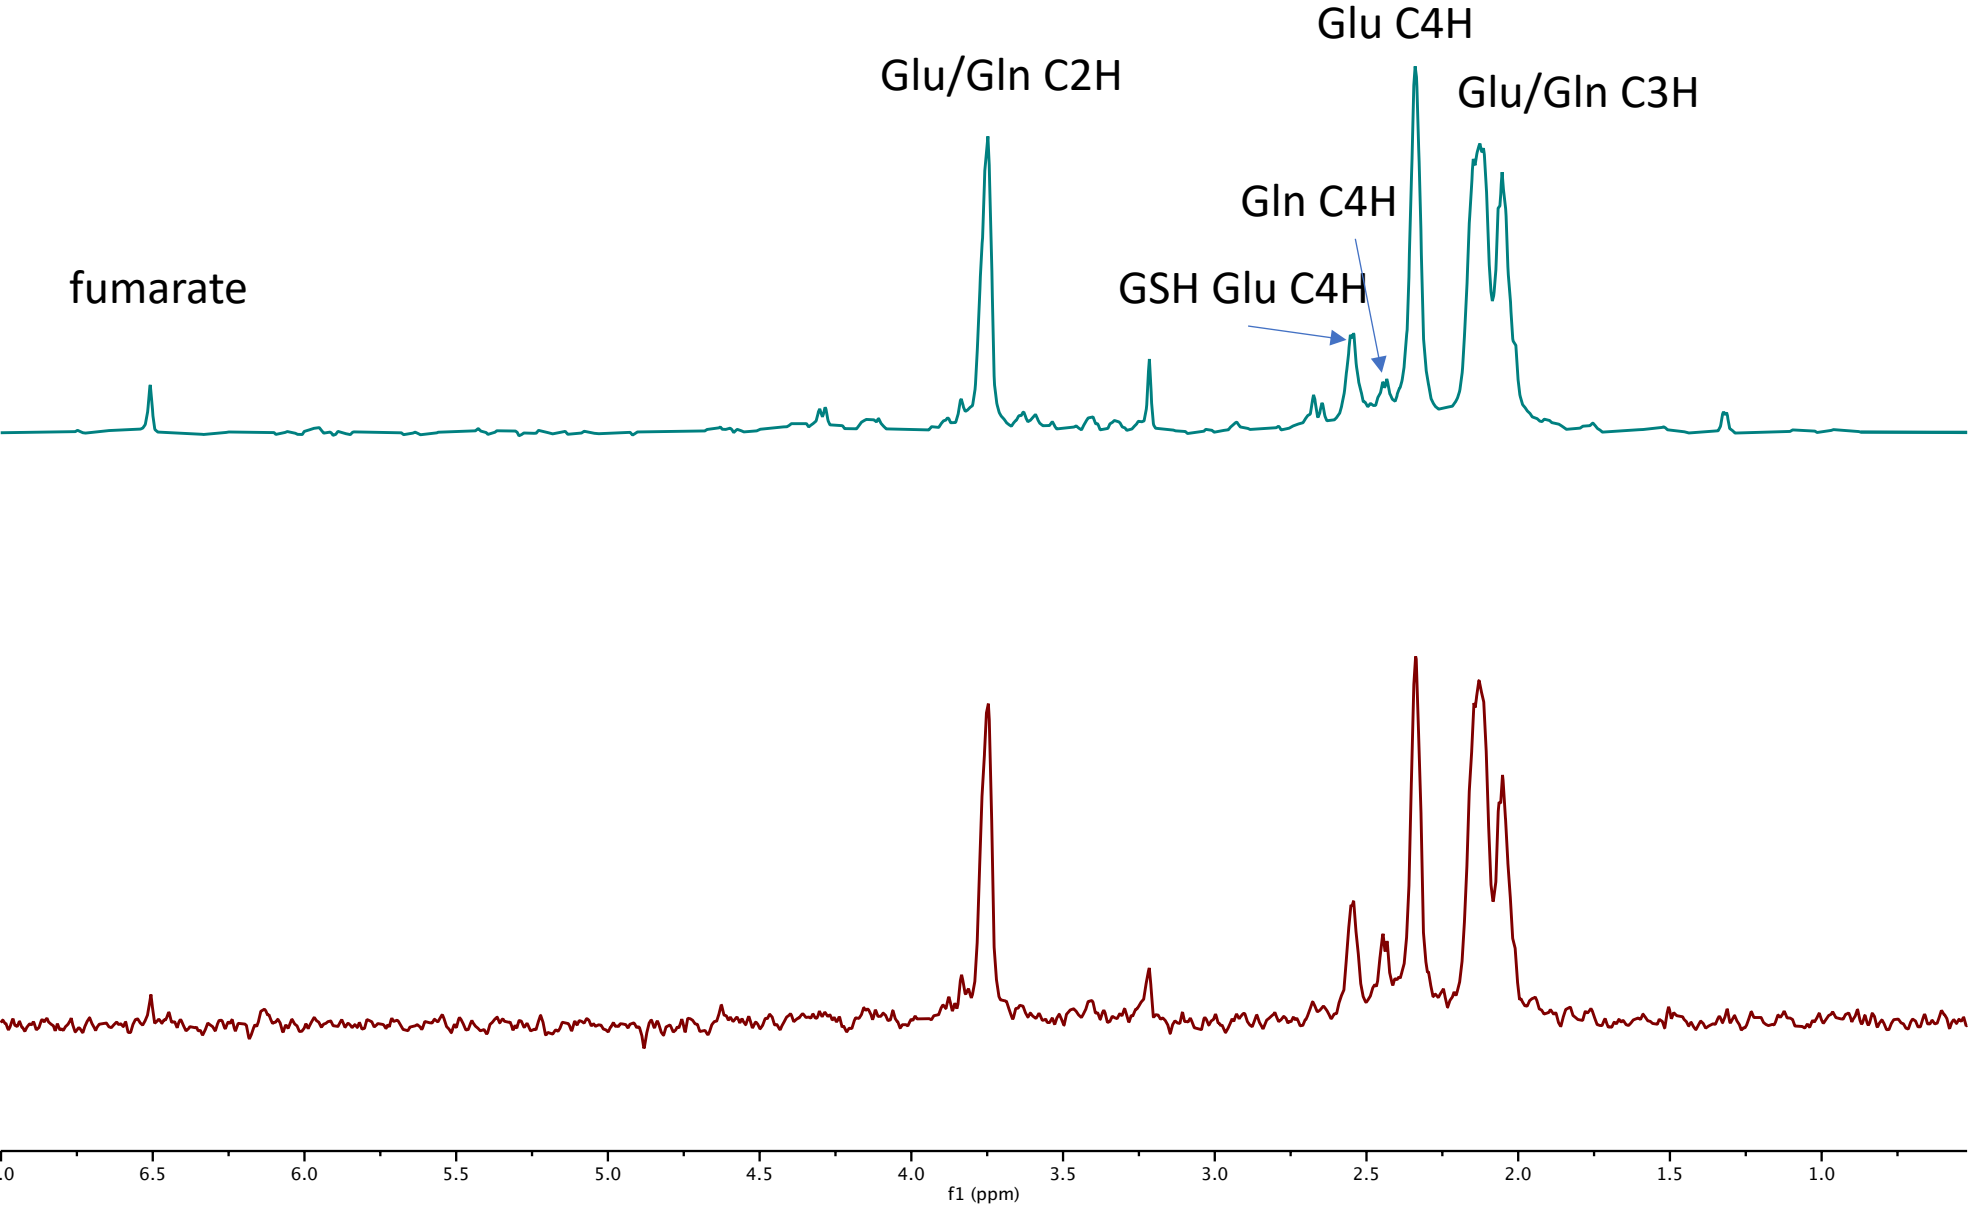

Table S1

|                                                     |                                                                                                                                                                                                                                                                  |
|-----------------------------------------------------|------------------------------------------------------------------------------------------------------------------------------------------------------------------------------------------------------------------------------------------------------------------|
| <b>Upregulated by Asn+Gln but not Asn or Gln</b>    | HSP90B1 GDF15 ZFP36L1 NDRG1 SLC20A1 SLC2A1 PHLDA1 GPRC5A LIMA1 BHLHE40<br>MCL1 DUSP1 PPP1R15 CSNK1E SAT1 HERPUD1 TNFSF9 TGFB1 HMGCS1 ACSL4 TM4S1<br>FDFT1 LIF JUND PPP1R15B DNAJB1 RABGAP1L UBC BTG1 HIST1H1C JUNB GABA RAPL1<br>ADM COLEC10 F3 HSPA5 DDIT3 KLF6 |
| <b>Downregulated by Asn+Gln but not Asn or Gln</b>  | MT-ND2 TAGLN NDST1 EIF3A MDM2 FUS MAT2A SFPQ MICALL1 NPLOC4 ABCA3<br>HNRNPM SPRR2A SUPT16H SMARCC1 NOP56 CAD MEGF8 ANKRD52 CBX6 SLC35A4<br>TAF15 SCRIB SH3BP5L MAPKAP1 STARD7 C15orf52 SETD7 IFI16 RCAN1 OBSCN CUL3 MT-<br>ND1 CSK EIF5                          |
| <b>Upregulated by Asn and Gln but not Asn+Gln</b>   | SAA2 STAT1 PDZK1IP1 FSTL1 GSN ANXA4 TMEM2 DHCR24 IDH2 HAVCR1 SAA1                                                                                                                                                                                                |
| <b>Downregulated by Asn and Gln but not Asn+Gln</b> | WARS PSAT1 PPP1R15A ARHGEF2 ASNS HIST1H2AC STC2 UPP1 G0S2                                                                                                                                                                                                        |
